# Supplementary material for: Qualitative and Quantitative Analysis of the Major Constituents in Shexiang Tongxin Dropping Pill by HPLC-Q-TOF-MS/MS and UPLC-QqQ-MS/MS
Source: MDPI journal article supplement (doi:10.3390/molecules201018597), 2015-10-14
Supplement: s1 [file s1]

## Supplementary Materials

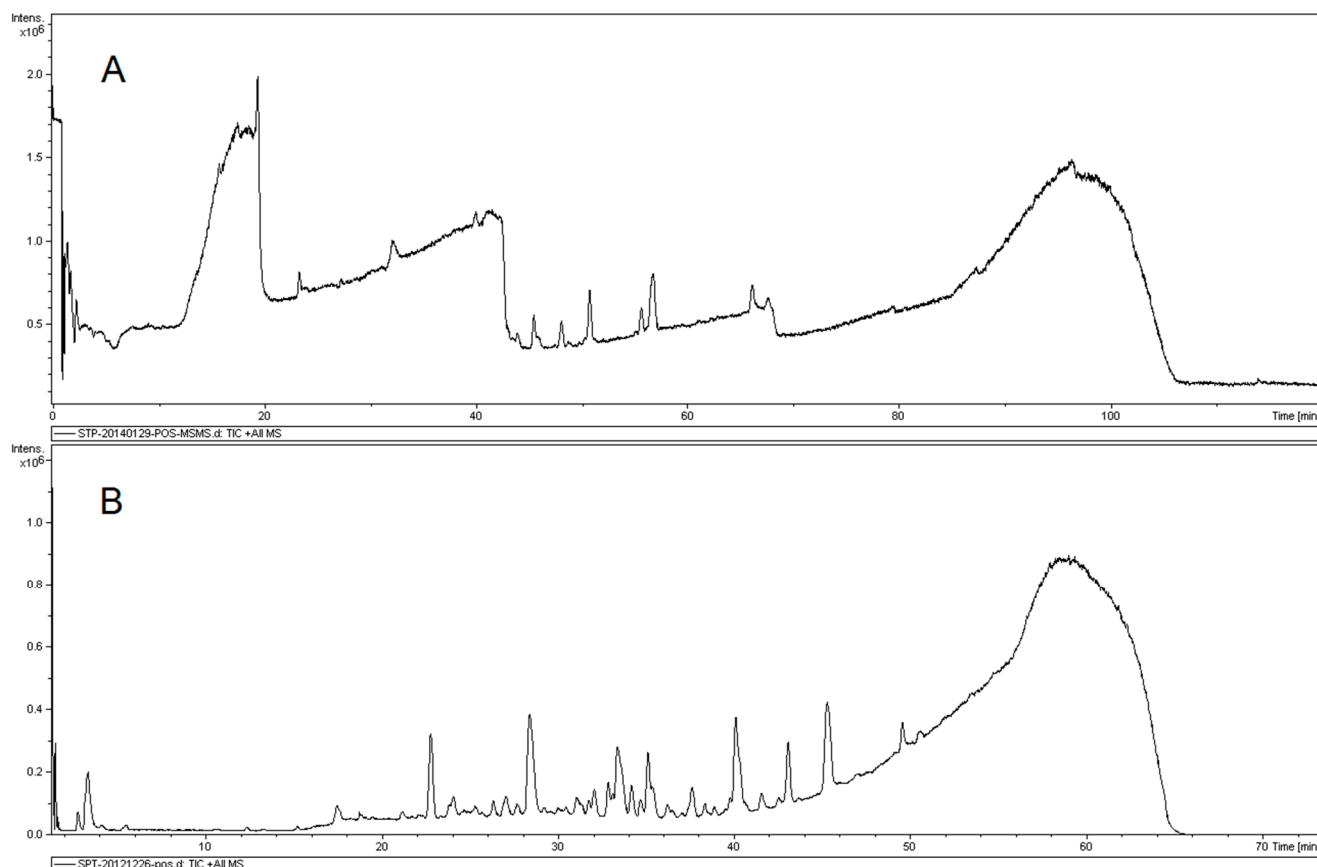

**Figure S1.** The HPLC-Q-TOF-MS/MS total ion chromatogram of STP by different mobile phases. **(A)** TIC of water/methanol as the mobile phases; **(B)** TIC of water/acetonitrile as the mobile phases.

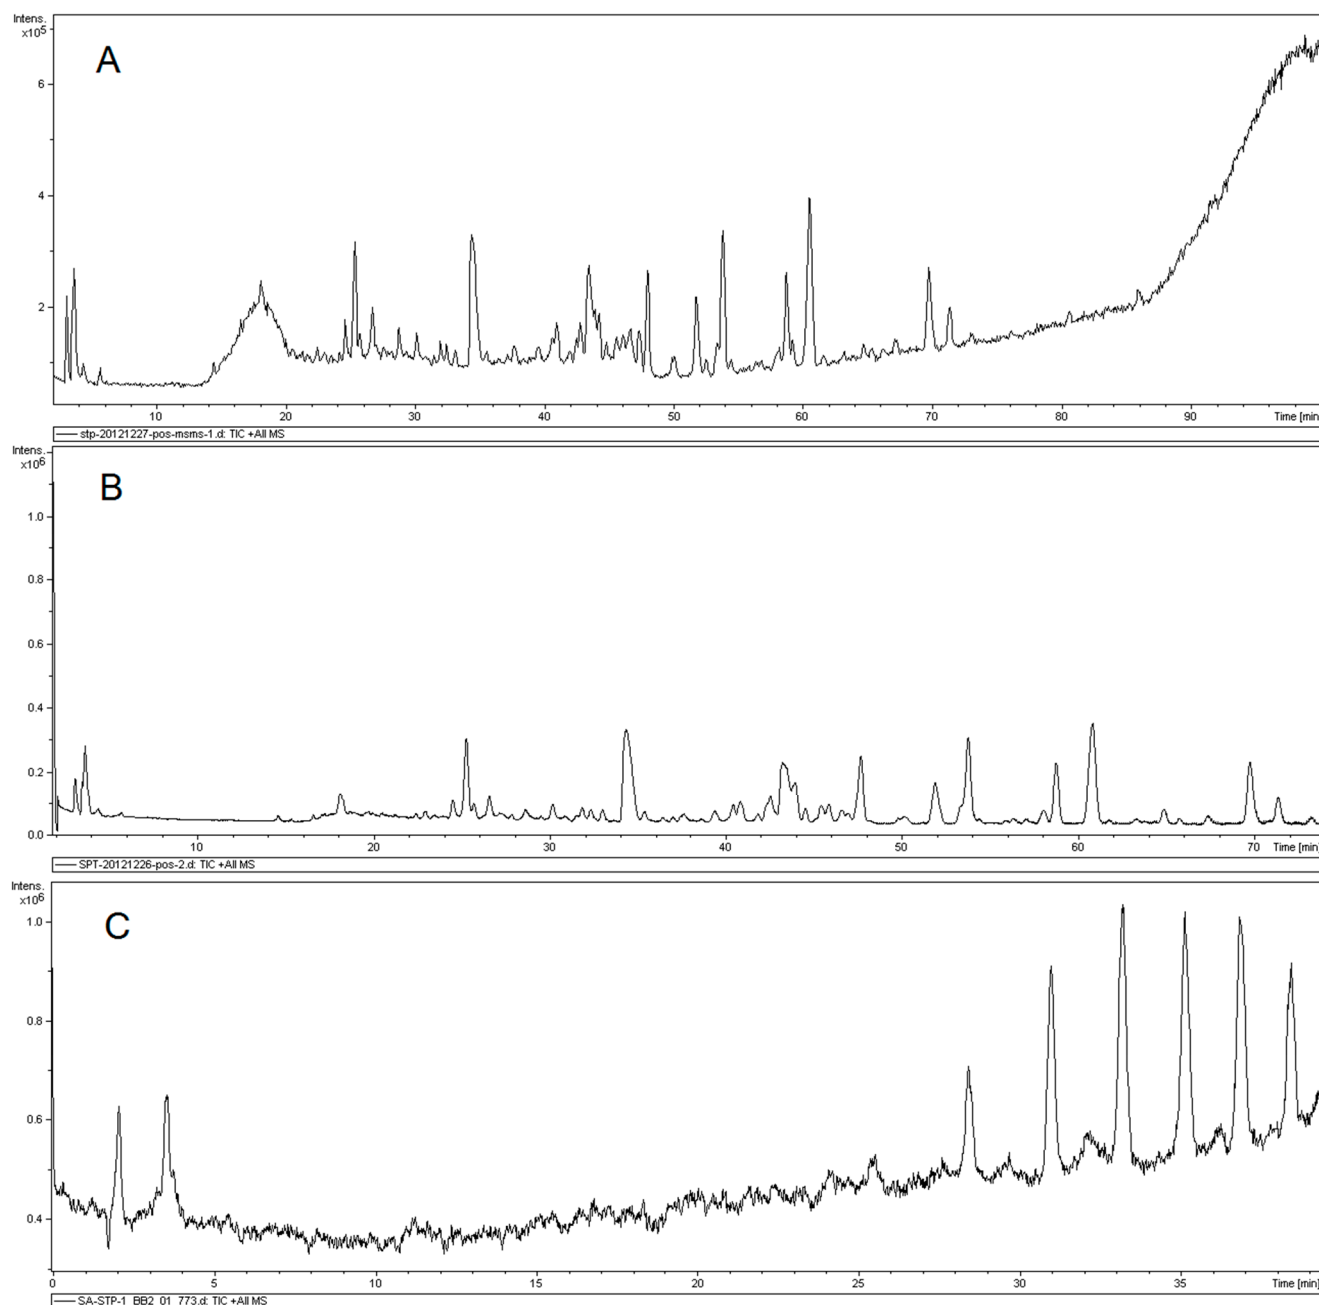

**Figure S2.** The HPLC-Q-TOF-MS/MS total ion chromatogram of STP by different acids in the mobile phases. **(A)** TIC of formic acid in the mobile phases; **(B)** TIC of trifluoroacetic acid in the mobile phases; **(C)** TIC of phosphoric acid in the mobile phases.

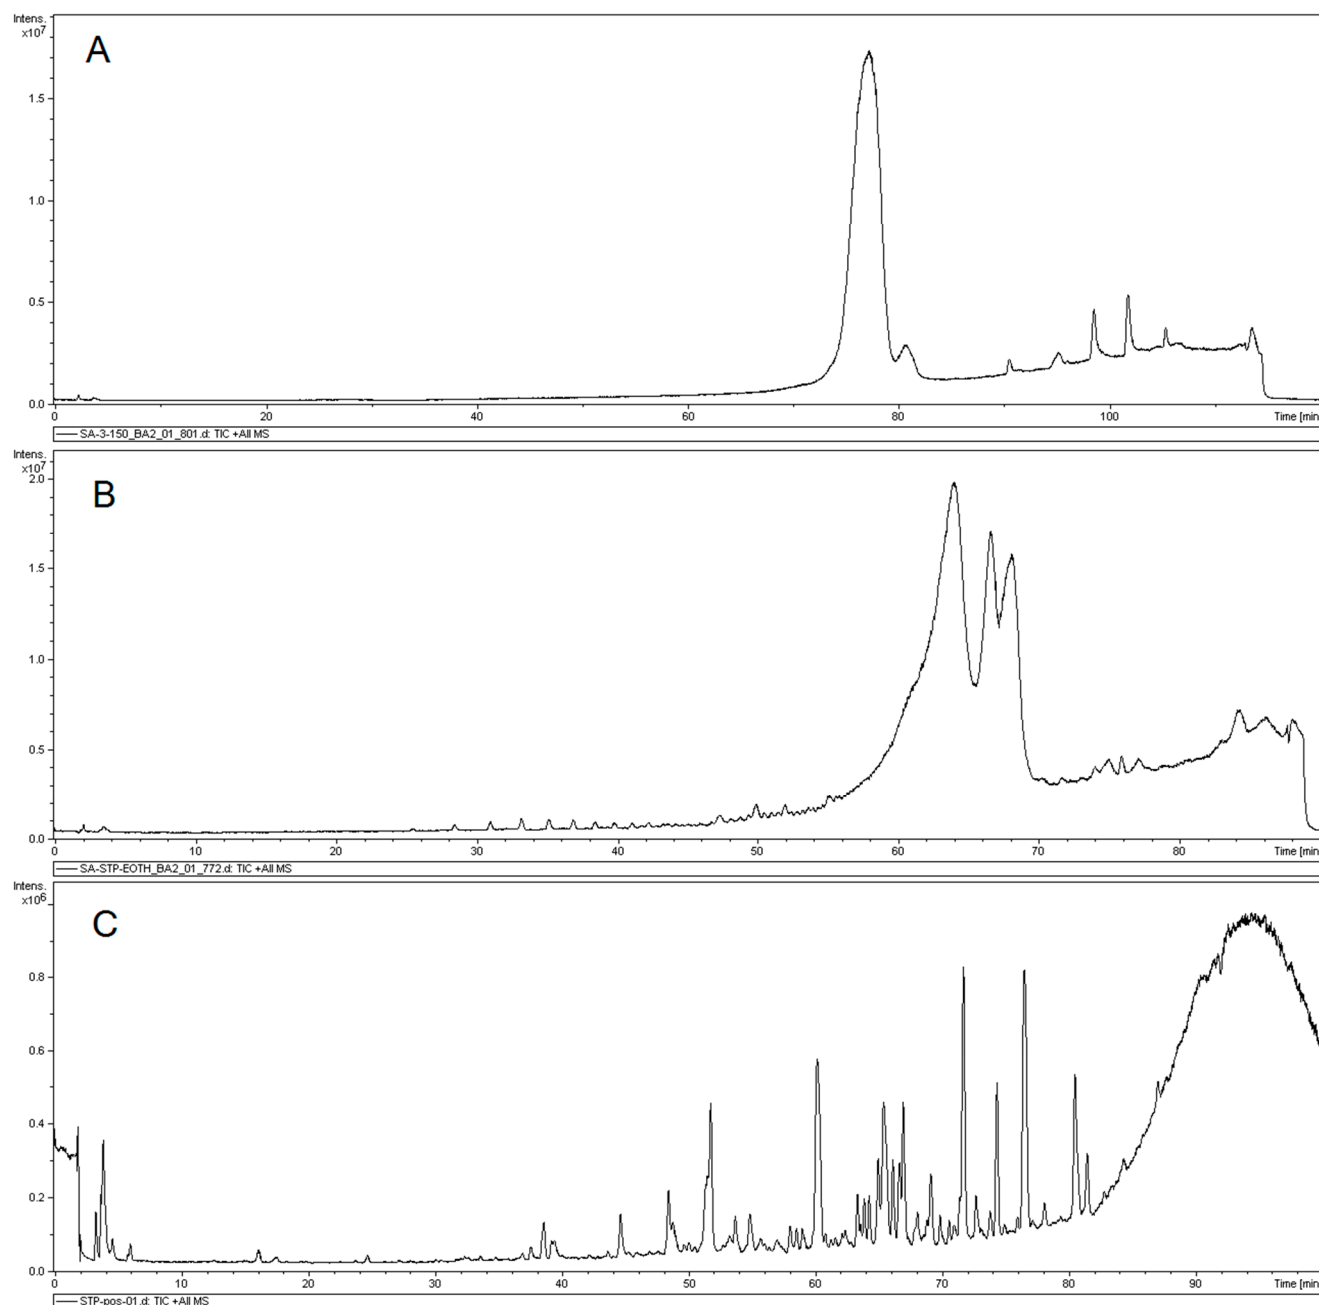

**Figure S3.** The HPLC-Q-TOF-MS/MS total ion chromatogram of STP by different chromatographic columns. **(A)** TIC of Agilent C18; **(B)** TIC of Ultimate XB ODS-C18 column; **(C)** TIC of Inertsil ODS-SP C18 column.

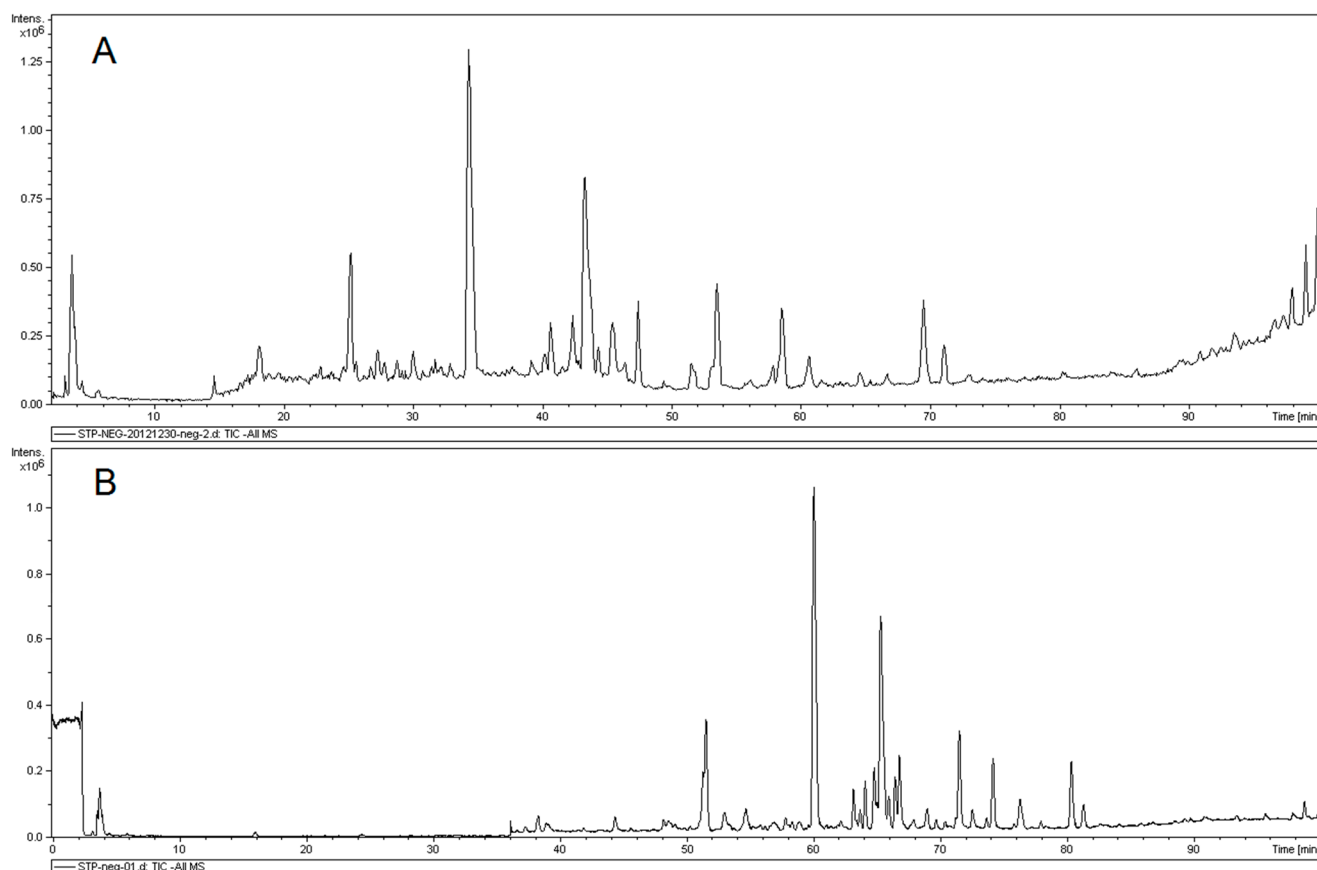

**Figure S4.** The HPLC-Q-TOF-MS/MS total ion chromatogram of STP by different programs of gradient elution in negative model. Both (A) and (B) are the different programs which had been tried.
